# Supplementary material for: Real-time, low-latency closed-loop feedback using markerless posture tracking
Source: eLife journal article supplement (doi:10.7554/elife.61909), 2020-12-08
Supplement: supp [file elife-61909-supp-v2.zip]

Archive with 7 entries (7 files):
- elife_poa_e61909_Transparent_Reporting_File.pdf
- elife_poa_e61909_Figure_2_figure_supplement_1.jpg
- elife_poa_e61909_Figure_2_figure_supplement_2.jpg
- elife_poa_e61909_Figure_2_figure_supplement_3.jpg
- elife_poa_e61909_Figure_2_figure_supplement_4.jpg
- elife_poa_e61909_Figure_6_figure_supplement_1.jpg
- elife_poa_e61909_Figure_6_figure_supplement_2.jpg
