# Supplementary figures and images for: Real-time, low-latency closed-loop feedback using markerless posture tracking
Source: eLife journal article supplement (doi:10.7554/elife.61909), 2020-12-08

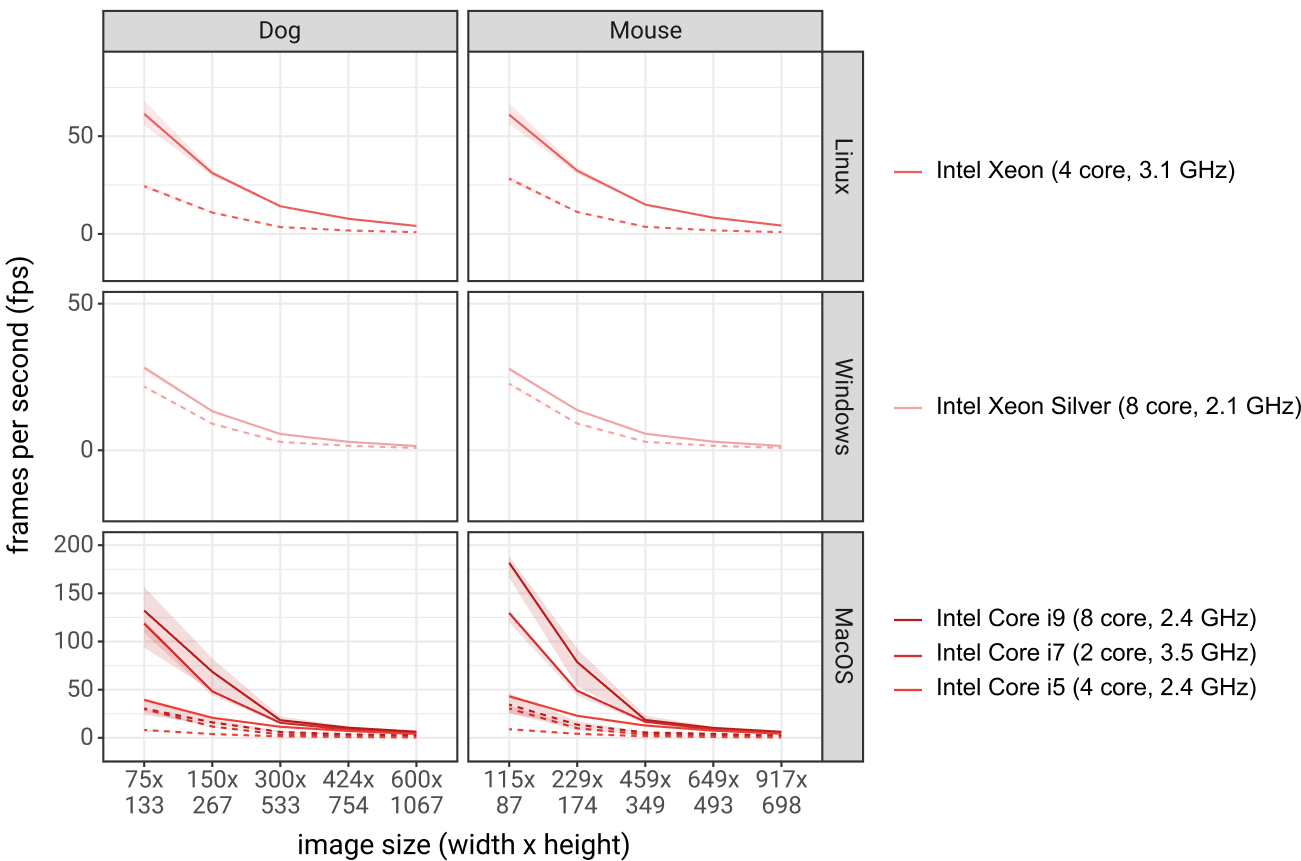

Supplement: supp [file elife-61909-supp-v2.zip › elife_poa_e61909_Figure_2_figure_supplement_1.jpg]

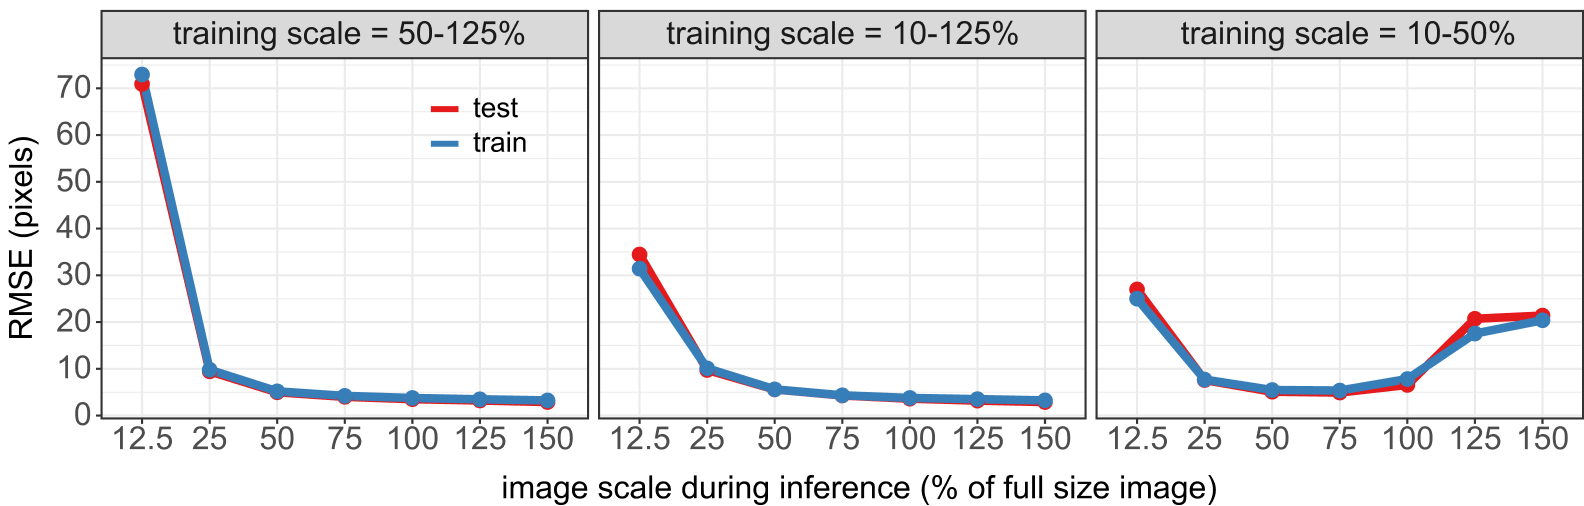

Supplement: supp [file elife-61909-supp-v2.zip › elife_poa_e61909_Figure_2_figure_supplement_2.jpg]

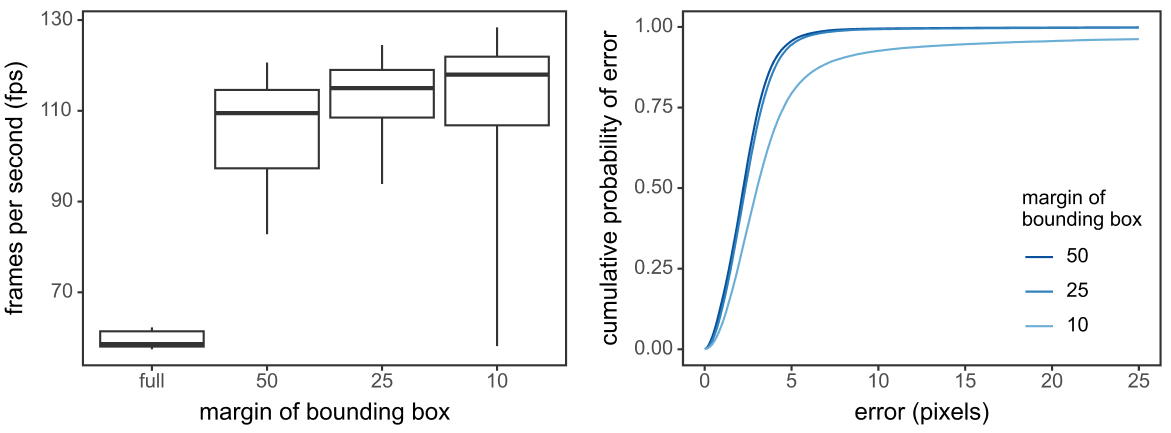

Supplement: supp [file elife-61909-supp-v2.zip › elife_poa_e61909_Figure_2_figure_supplement_3.jpg]

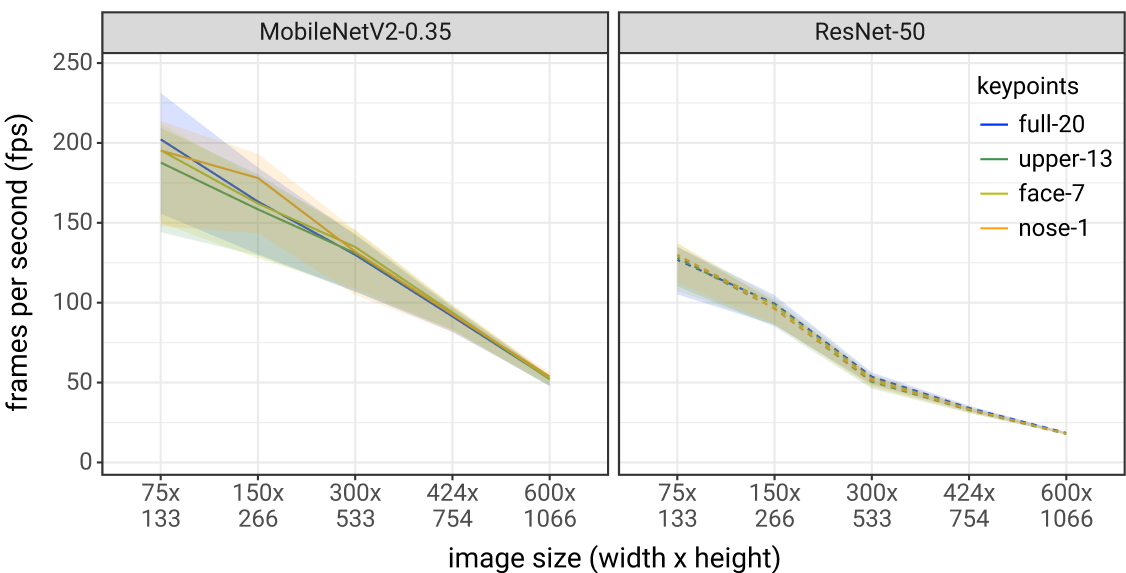

Supplement: supp [file elife-61909-supp-v2.zip › elife_poa_e61909_Figure_2_figure_supplement_4.jpg]

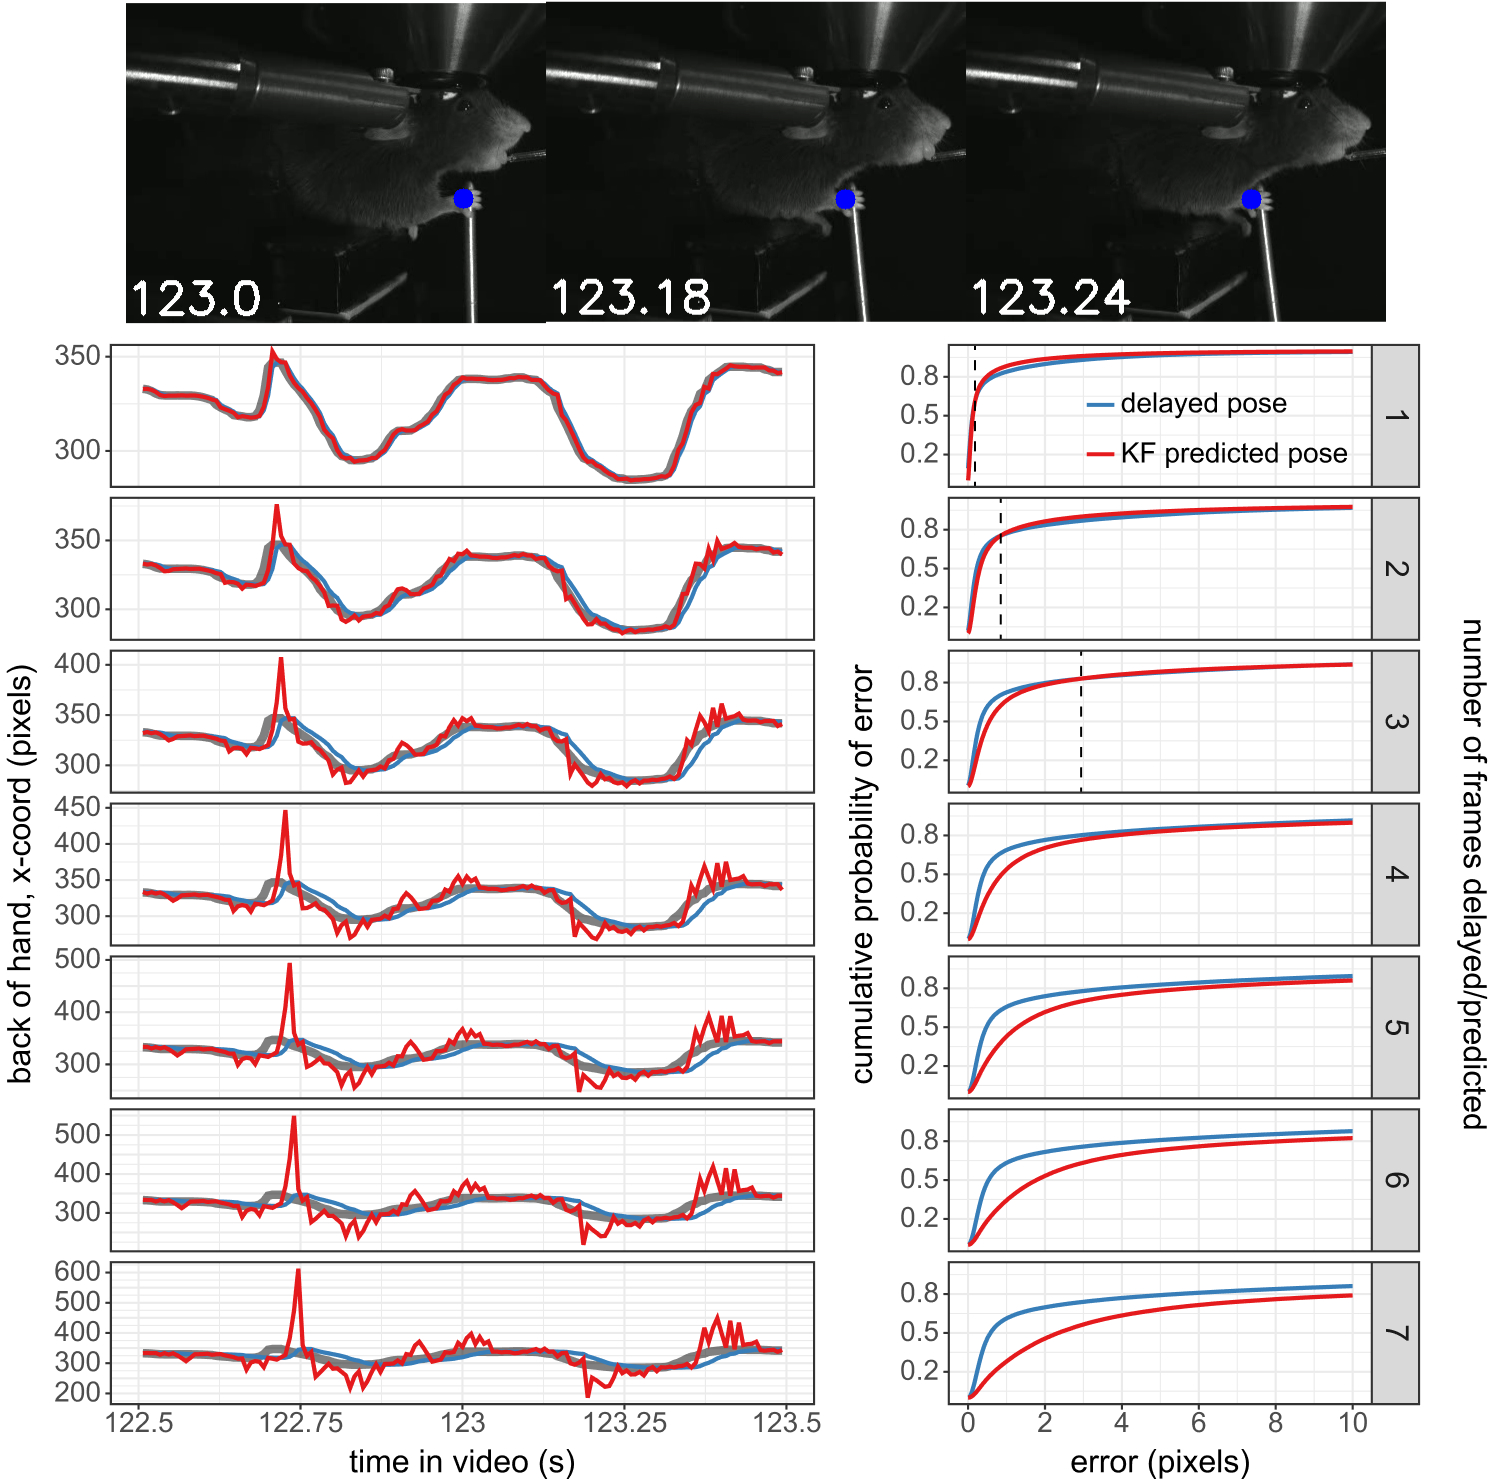

Supplement: supp [file elife-61909-supp-v2.zip › elife_poa_e61909_Figure_6_figure_supplement_1.jpg]

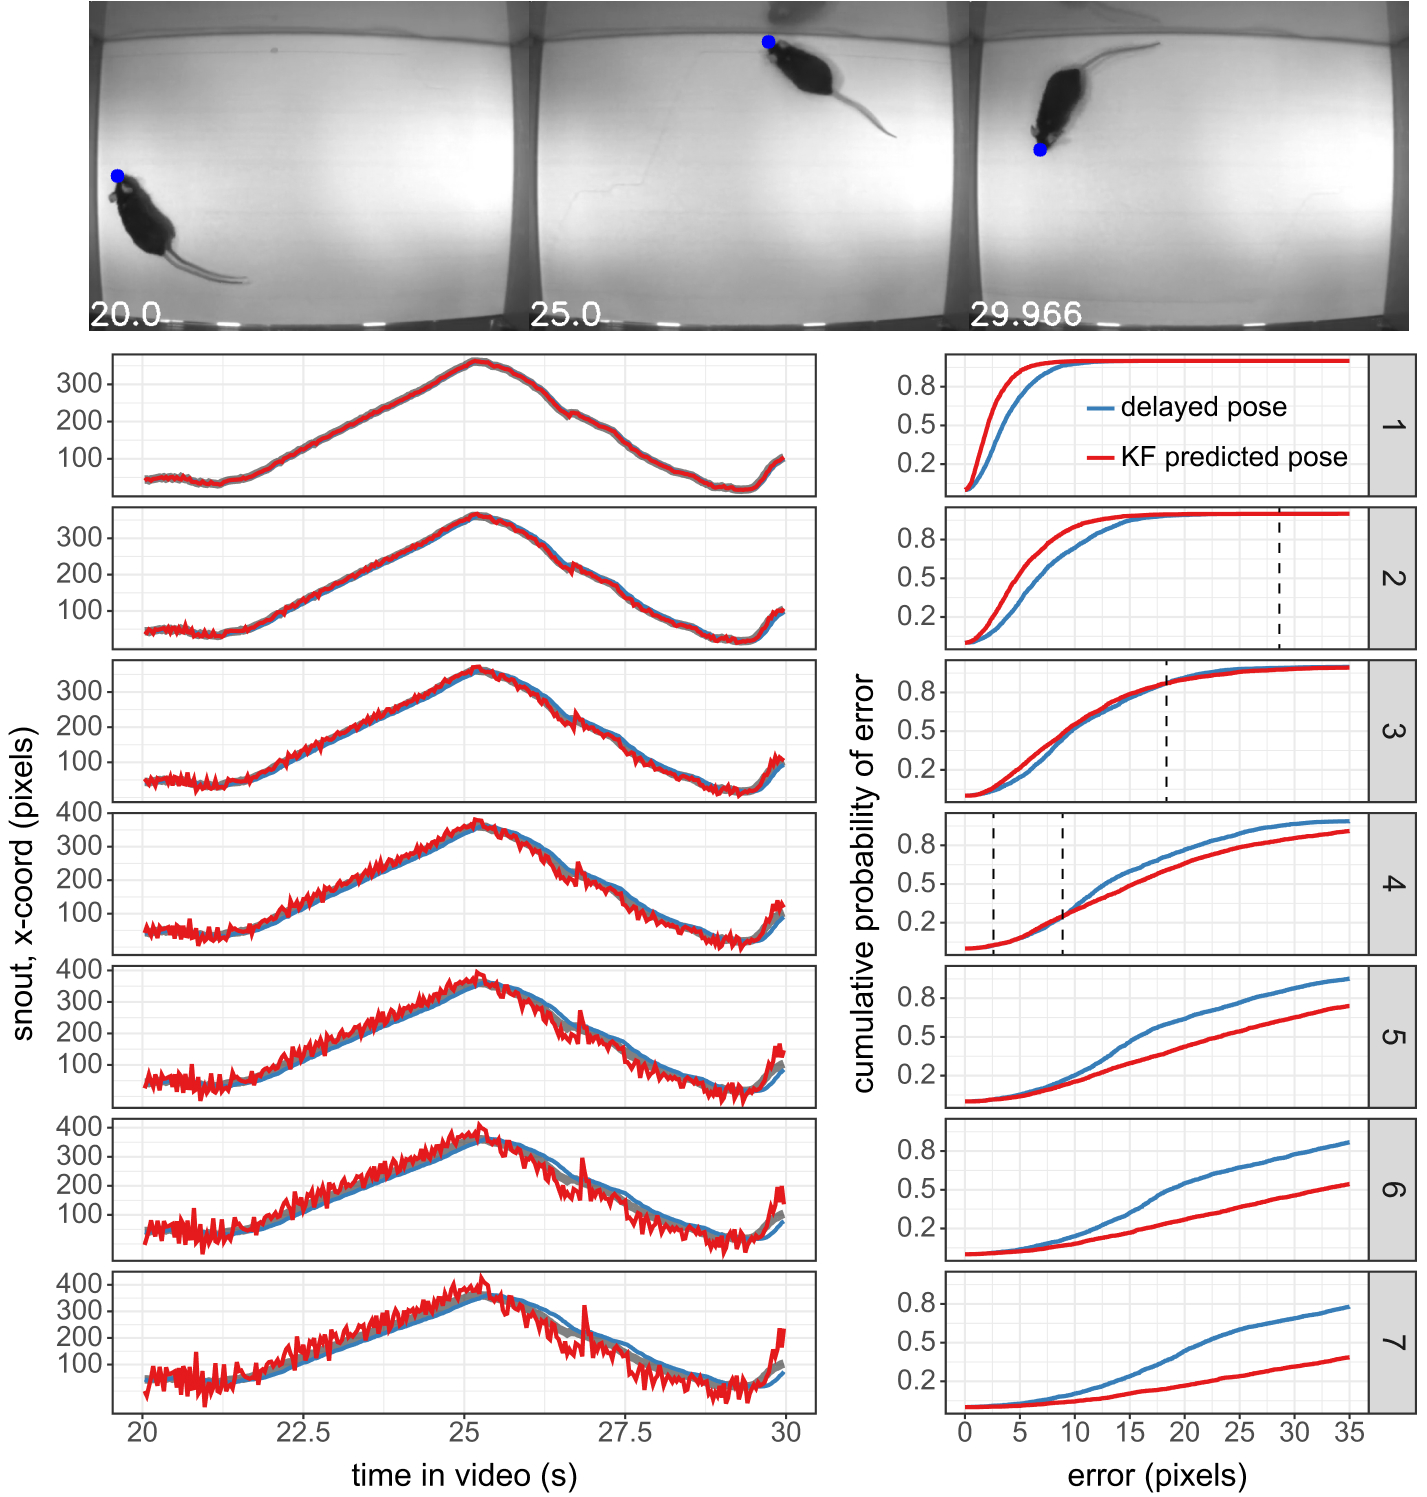

Supplement: supp [file elife-61909-supp-v2.zip › elife_poa_e61909_Figure_6_figure_supplement_2.jpg]
